# Supplementary material
Source: PubMed Central journal article supplement (PMC5916001)

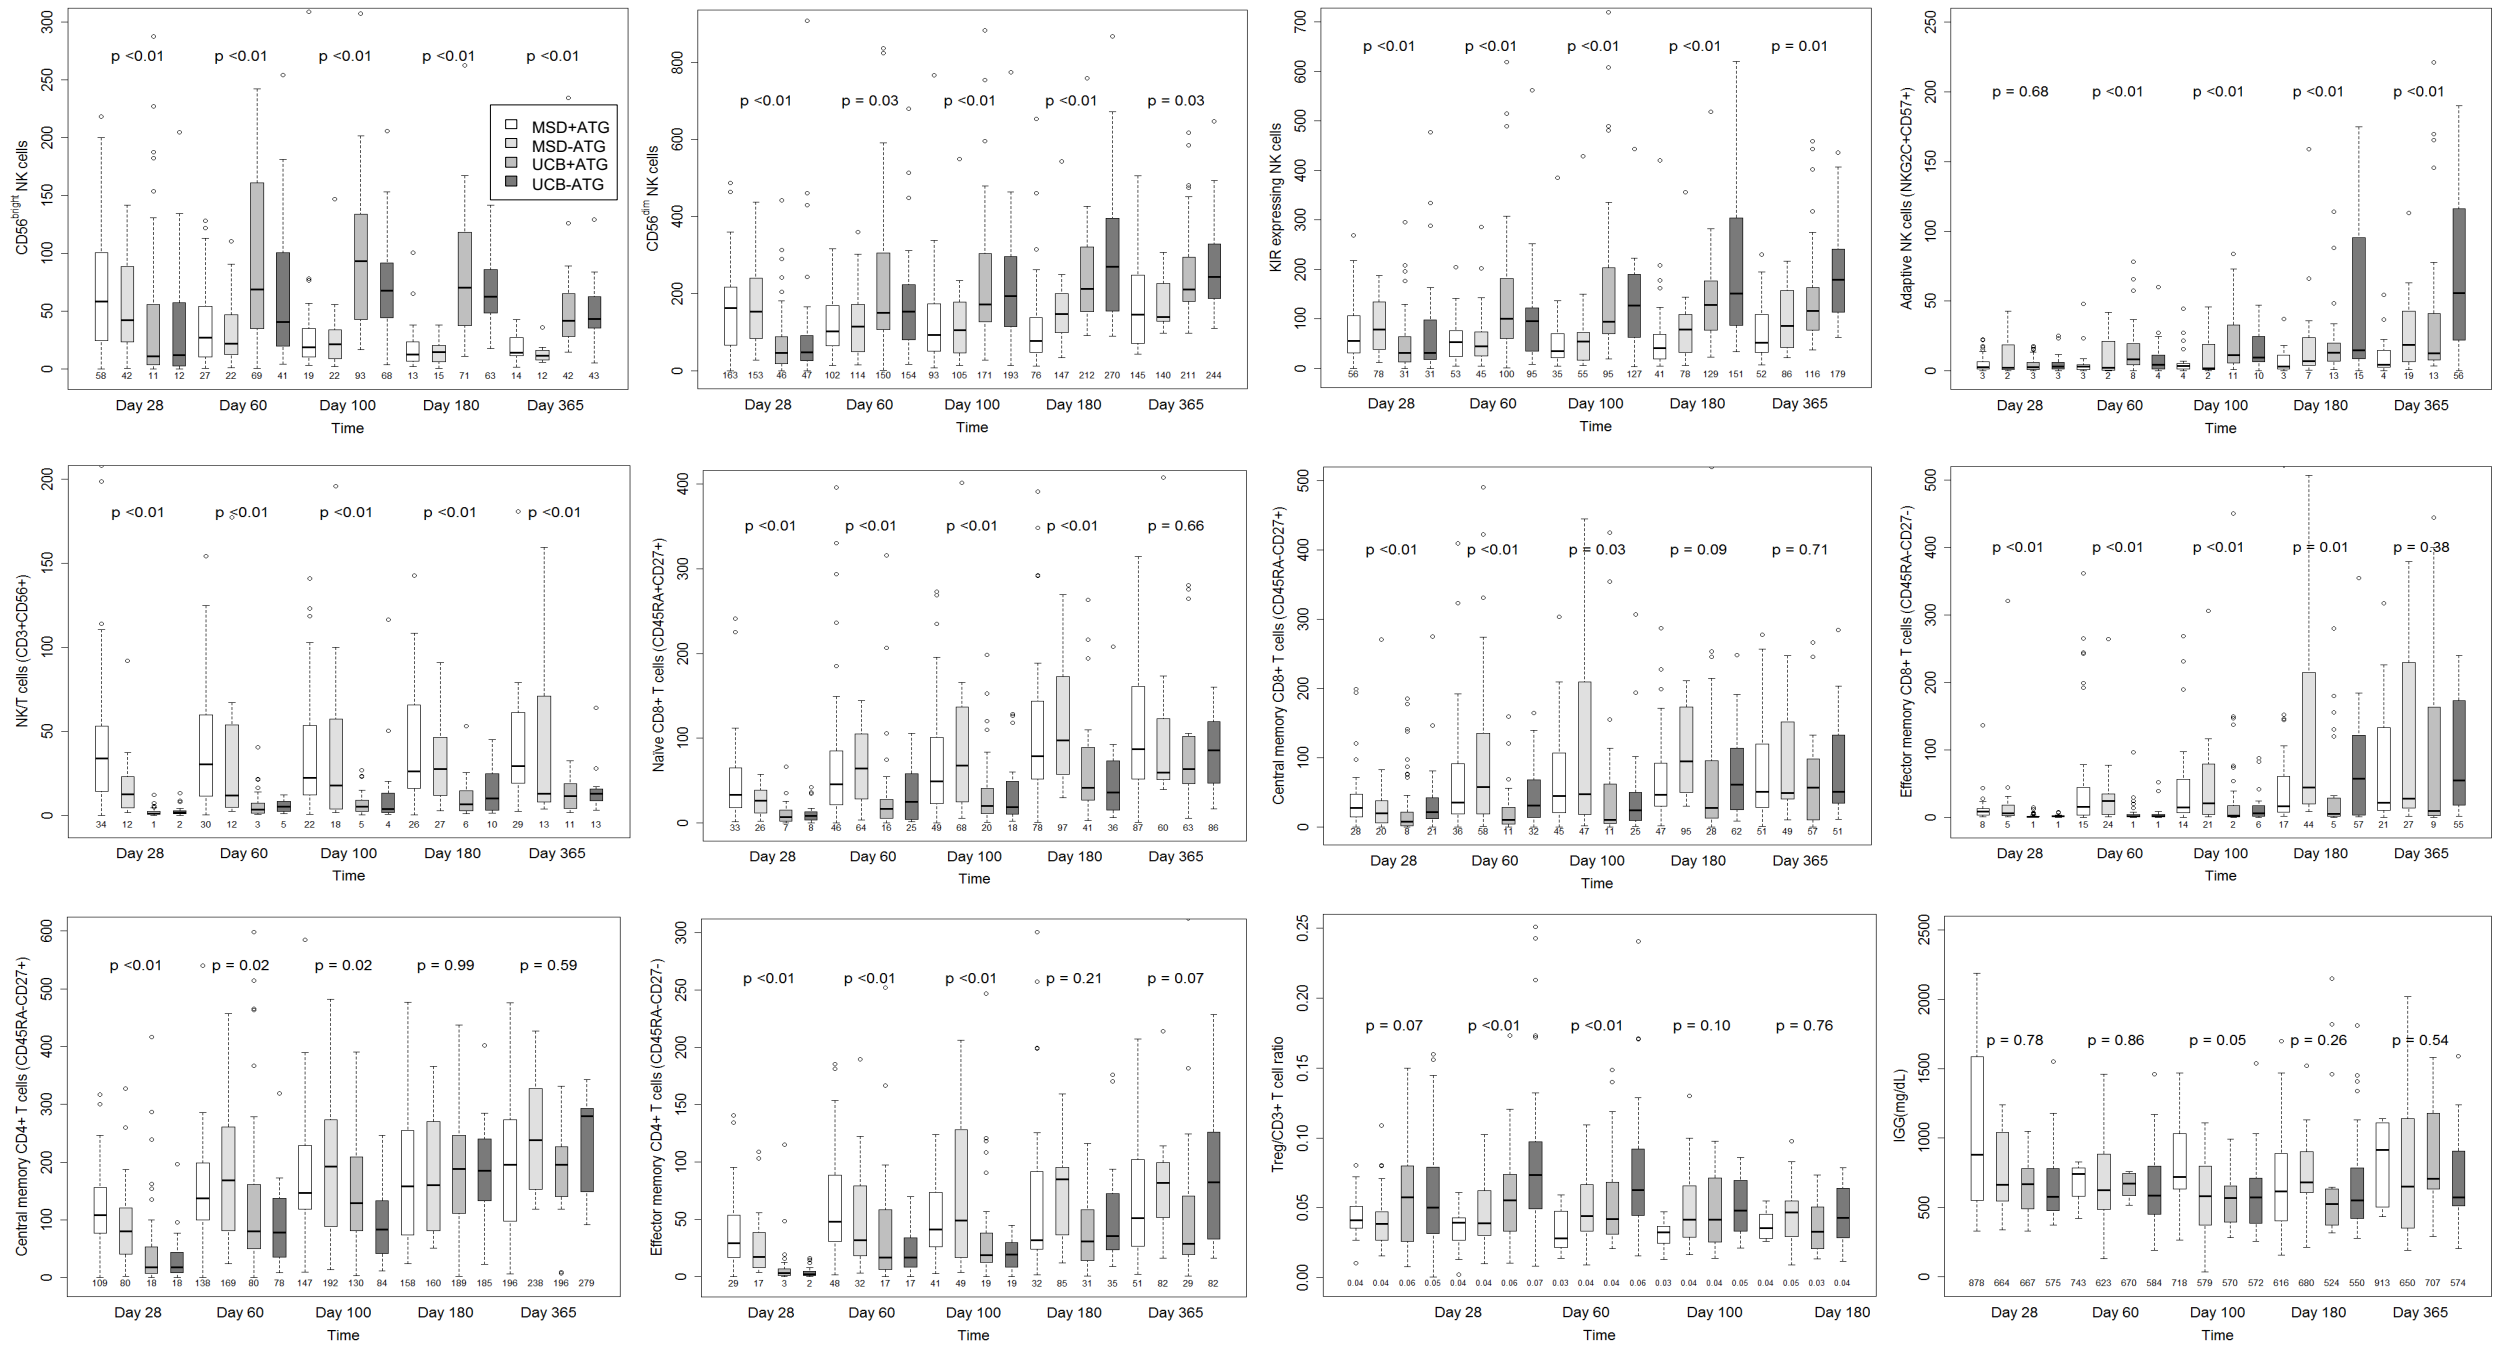

Supplement: ba014464-suppl1.pdf [file ba014464-suppl1.pdf]
